# Supplementary material for: Photocatalytic Treatment of Stained Wastewater Coming from Handicraft Factories. A Case Study at the Pilot Plant Level
Source: MDPI journal article supplement (doi:10.3390/w13192705), 2021-09-29
Supplement: s1 [file s1]

**Table S1.** Dyes degradation Standard Deviation

| Time | Photolysis | SD   | UV/H <sub>2</sub> O <sub>2</sub> 0.07 | SD   | UV/H <sub>2</sub> O <sub>2</sub> 0.05 | SD   | TiO <sub>2</sub> | SD   |
|------|------------|------|---------------------------------------|------|---------------------------------------|------|------------------|------|
| 0    | 100        | 0    | 100                                   | 0    | 100                                   | 0    | 100              | 0    |
| 60   | 96.25      | 1.36 | 99.83                                 | 1.45 | 99.66                                 | 1.97 | 100              | 1.18 |
| 120  | 91.10      | 1.74 | 75.53                                 | 1.58 | 83.85                                 | 1.88 | 83.02            | 1.94 |
| 180  | 90.50      | 2.41 | 68.47                                 | 1.69 | 82.82                                 | 1.75 | 66.04            | 1.65 |
| 240  | 82.37      | 2.01 | 64.49                                 | 1.51 | 74.23                                 | 1.15 | 50.94            | 1.48 |
| 300  | 81.57      | 1.84 | 58.29                                 | 1.92 | 72.16                                 | 2.11 | 43.40            | 1.96 |
| 360  | 68.69      | 1.79 | 49.02                                 | 2.39 | 41.92                                 | 2.65 | 41.51            | 1.93 |
| 420  | 62.16      | 1.97 | 38.56                                 | 2.14 | 40.21                                 | 2.10 | 41.36            | 2.05 |

**Table S2.** Bacteria Removal Standard deviation

| Time | Photolysis | SD   | UV/H <sub>2</sub> O <sub>2</sub> 0,05 | SD   | UV/H <sub>2</sub> O <sub>2</sub> 0,07 | SD   | TiO <sub>2</sub> | SD   | UV/H <sub>2</sub> O <sub>2</sub> - TiO <sub>2</sub> | SD   |
|------|------------|------|---------------------------------------|------|---------------------------------------|------|------------------|------|-----------------------------------------------------|------|
| 0    | 100        | 0    | 100                                   | 0    | 100                                   | 0    | 100              | 0    | 100                                                 | 0    |
| 180  | 91.03      | 2.50 | 92.80                                 | 1.87 | 91.91                                 | 2.10 | 85.12            | 1.98 | 82.41                                               | 1.50 |
| 300  | 85.81      | 2.40 | 87.51                                 | 1.70 | 86.80                                 | 1.90 | 73.21            | 2.60 | 67.74                                               | 1.68 |
| 420  | 79.89      | 1.70 | 82.41                                 | 2.10 | 81.30                                 | 2.40 | 60.46            | 2.10 | 50.71                                               | 1.54 |

**Table S3.** TOC Standard deviation

| Time | Photolysis | SD   | UV/H <sub>2</sub> O <sub>2</sub> 0,05 | SD   | UV/H <sub>2</sub> O <sub>2</sub> 0,07 | SD   | TiO <sub>2</sub> | SD   | UV/H <sub>2</sub> O <sub>2</sub> - TiO <sub>2</sub> | SD   |
|------|------------|------|---------------------------------------|------|---------------------------------------|------|------------------|------|-----------------------------------------------------|------|
| 0    | 100        | 0    | 100                                   | 0    | 100                                   | 0    | 100              | 0    | 100                                                 | 0    |
| 120  | 98.25      | 1.51 | 98.54                                 | 1.42 | 99.35                                 | 1.99 | 95.99            | 1.54 | 95.48                                               | 1.54 |
| 240  | 97.04      | 2.04 | 95.09                                 | 1.56 | 98.8                                  | 1.01 | 92.71            | 1.01 | 91.16                                               | 1.63 |
| 420  | 96.24      | 1.74 | 94.63                                 | 1.84 | 98.28                                 | 1.50 | 91.04            | 1.78 | 87.04                                               | 1.74 |
